# Supplementary material for: High anteromedial insertion reduced anteroposterior and rotational knee laxity on mid-term follow-up after anatomic anterior cruciate ligament reconstruction
Source: PeerJ. 2023 Aug 18;11:e15898. doi: 10.7717/peerj.15898 (PMC10441525; doi:10.7717/peerj.15898)
Supplement: Data S1 — (A) C olumn 1: patients sex (B) Column 2: patients age (unit: years old ) (C) Column 3: patients injury side (D) Column 4: ACLR femoral tunnel position (E) Column 5: associated injury (F) Column 6: pre-operation KT-2000 (SSD,unit: mm) (G) Column 7: post-operation KT-2000 (SSD,unit: mm) (H) Column 8: pre-operation PST (unit: grade) (I) Column 9: post-operation PST (unit: grade) [file peerj-11-15898-s001.xlsx]

## Sheet: Sheet1
sex	age	side	femoral tunnel positions	associated injury	pre-op KT-2000（SSD mm）	Post-op KT-2000（SSD mm）	pre-op PST（grade）	post-op PST（grade）
male	23	right	HAM	medial meniscus	7	4	1	0
male	29	left	HAM	medial meniscus	5	0	2	1
male	44	right	HAM	medial meniscus	2	1	2	0
male	47	right	HAM	medial meniscus	5	2	1	0
male	41	right	HAM	lateral meniscus	6	0	2	0
male	41	left	HAM	lateral meniscus	5	0	1	0
male	42	right	HAM	medial meniscus	4	0	1	0
female	22	right	HAM		1	1	2	0
male	37	left	HAM	meniscus	5	0	1	0
male	24	left	HAM		4	0	1	0
male	56	left	HAM	meniscus	4	0	1	0
male	23	right	HAM		5	0	1	0
male	44	right	HAM		10	2	2	1
male	55	left	HAM	medial meniscus	4	0	1	0
male	30	left	HAM	medial meniscus	5	0	2	0
male	41	left	HAM	meniscus	4	1	1	0
female	40	right	HAM	meniscus	5	1	1	0
male	40	right	HAM	meniscus	6	1	1	0
male	40	right	HAM	lateral meniscus	6	0	1	0
female	25	left	HAM	medial meniscus、MCL、MPFL	3	0	1	0
male	42	left	HAM	meniscus	5	0	2	0
female	27	right	HAM	lateral meniscus、Femoral condyle weight-bearing cartilage II	4	2	1	0
female	17	right	HAM		2	0	1	0
male	32	right	HAM	lateral meniscus	5	1	1	0
male	30	right	HAM		3	1	1	0
male	51	right	HAM	medial meniscus	4	0	2	0
male	26	left	HAM	lateral meniscus	3	0	1	0
female	28	right	HAM		5	2	2	0
male	18	left	HAM	RAMP+lateral meniscus	5	2	1	0
male	20	left	HAM	medial meniscus、lateral meniscus	10	0	2	0
female	34	right	HAM	meniscus	5	0	1	0
female	16	left	HAM		6	1	1	0
male	33	left	HAM	medial meniscus	5	2	1	0
female	20	left	HAM	medial meniscus	4	1	1	0
male	20	left	HAM		4	2	2	0
male	26	right	HAM		4	2	2	0
female	50	left	HAM		4	0	2	0
female	19	right	HAM	medial meniscus、MCL	4	2	1	0
female	41	right	HAM	medial meniscus	4	2	2	0
male	56	right	HAM	medial meniscus	3	1	0	0
female	19	left	HAM	medial meniscus、lateral meniscus、MCL	4	2	2	1
male	35	left	HAM	lateral meniscus	5	2	2	0
male	17	right	HAM		7	2	1	0
male	18	right	HAM		5	2	1	0
female	47	left	HAM		7	3	2	1
male	37	left	HAM		5	2	1	0
male	16	left	HAM	MCL	4	1	1	0
female	17	left	HAM	medial meniscus	6	2	2	0
female	17	left	HAM		2	0	1	0
female	40	left	HAM		4	0	1	0
female	22	right	HAM		2	0	1	0
female	52	left	HAM	lateral meniscus	5	0	1	0
female	20	both	HAM		3	3	1	1
female	50	left	HAM	lateral meniscus	3	1	1	0
male	37	right	HAM	lateral meniscus	7	0	1	0
male	28	right	HAM	meniscus	5	2	1	0
male	20	right	HAM	lateral meniscus	2	1	2	0
male	28	right	HAM	lateral meniscus	4	2	1	0
male	37	left	HAM	medial meniscus	5	0	1	0
male	22	right	HAM		4	0	1	0
male	32	left	HAM		7	4	1	0
male	27	left	HAM		4	1	1	0
female	21	right	HAM	lateral meniscus	5	0	2	0
male	19	right	HAM		4	1	1	0
male	31	right	HAM		4	1	1	0
male	31	right	HAM		6	2	1	0
female	22	right	HAM		6	2	2	1
male	47	left	HC	lateral meniscus	6	1	2	1
female	23	right	HC		5	2	2	0
female	56	left	HC	lateral meniscus	3	0	1	1
male	22	left	HC		4	1	1	0
female	19	right	HC	lateral meniscus	5	2	1	0
male	26	left	HC	lateral meniscus	4	1	1	0
female	18	right	HC	lateral injury半月板体部	4	1	2	1
female	17	left	HC	medial meniscus	5	2	1	0
female	18	right	HC	medial meniscus	5	1	1	0
female	32	right	HC	meniscus	5	4	2	2
male	46	left	HC		5	0	1	0
male	41	left	HC	meniscus injury	5	0	1	0
female	41	right	HC	meniscus	5	4	1	1
male	38	right	HC	medial meniscus	5	0	1	0
male	34	left	HC		3	0	1	0
female	47	left	HC	meniscus	5	4	1	0
male	35	left	HC	medial meniscus	5	2	1	0
male	50	right	HC		5	0	1	0
female	35	left	HC		5	1	1	0
male	29	left	HC	meniscus	5	0	2	1
female	26	left	HC		6	1	1	0
female	17	right	HC		4	1	1	0
female	41	right	HC		4	1		0
female	31	left	HC		4	2	1	0
male	32	right	HC	MCL	5	1	1	0
male	46	left	HC		3	2	1	0
female	41	left	HC		6	1	1	0
male	26	right	HC	medial meniscus	5	3	2	1
male	38	left	HC	lateral meniscus	6	3	2	2
male	18	right	HC	meniscus	5	0	1	0
male	50	left	HC		4	0	2	1
male	51	right	HC	lateral meniscus	5	2	1	0
male	29	right	HC	lateral meniscus	6	1	1	0
male	40	left	HC	medial meniscus	4	1	1	0
male	19	right	HC		4	1	1	0
male	43	left	HC
male	35	right	HC	lateral meniscus	5	1	1	0
male	32	right	HC		5	1	1	2
female	41	right	HC	meniscus	5	3	2	1
female	39	left	HC	lateral meniscus	5	5	2	1
female	46	left	HC		5	2	2	1
male	32	right	HC	medial meniscus	5	2	1	0
male	34	left	HC		5	1	1	0
male	58	left	HC		4	0	1	0
male	40	right	HC	meniscus	5	2	1	0
female	38	left	HC		5	3	1	0
male	40	right	HC	MCL	5	5	1	1
male	40	right	LC		4	1	1	0
female	21	left	LC		5	1	1	0
male	32	right	LC	medial meniscus	4	1	1	0
male	38	left	LC	RAMP	5	2	1	0
female	17	left	LC		6	2	1	0
female	25	left	LC	meniscus	7	2	2	0
female	56	right	LC	MCL	3	0		1
male	34	right	LC	lateral meniscus	7	3	1	0
male	32	right	LC		5	0	1	0
male	47	right	LC		5	0	2	1
male	38	left	LC		7	5	1	0
male	35	right	LC		5	1	1	0
male	35	right	LC	lateral meniscus	5	1	1	0
male	28	right	LC	lateral meniscus	4	0	1	1
male	38	right	LC	lateral meniscus & Ramp＜0.5mm	4	1	1	0
male	22	right	LC	lateral meniscus	6	3	1	0
male	36	right	LC	medial meniscus	4	0	1	0
male	36	left	LC	RAMP	5	0	2	1
male	41	right	LC	meniscus	5	2	2	0
female	20	both	LC		3	3	2	1
female	34	right	LC	MCL	5	2	1	0
male	37	right	LC	meniscus	5	0	1	0
male	32	right	LC	lateral meniscus	3	0	1	0
female	27	right	LC		4	0	1	0
male	34	left	LC	medial meniscus	5	2	1	0
female	25	left	LC		5	1	1	0
male	40	right	LC		4	0	1	0
male	45	left	LC		5	0	1	0
male	34	left	LC		4	2	1	0
male	37	right	LC		3	2	1	0
female	26	left	LC		4	0	1	0
male	22	right	LC	lateral meniscus	5	1	1	0
male	32	left	LC	lateral meniscus	6	0	1	0
male	32	right	LC	lateral meniscus	6	0	1	0
male	36	left	LC	medial meniscus	3	1	1	0
female	33	right	LC		4	1	1	0
female	19	left	LC		5	0	1	0
male	42	left	LC	meniscus meniscus	3	0	1	1
male	43	right	LC	lateral meniscus	6	0	1	0
male	27	left	LC		5	1	1	0
female	29	left	LC		4	0	2	1
female	40	left	LC		6	2	1	0
female	35	left	LC		5	2	1	0
male	37	right	LC		5	0	1	0
female	24	left	LC		4	0	1	0
female	58	right	LC		4	1	1	0
female	54	left	LC		5	0	1	0
female	27	left	LC		5	2	1	0
male	29	left	LC		6	1	1	0
male	32	left	LC		5	0	1	0
male	34	right	LC		6	4	2	1
female	27	left	LC		5	1	1	0
female	38	right	LC		5	1	1	0
male	23	left	LC	meniscus	4	0	1	0
